# Supplementary material for: The kinetic characteristics of human and trypanosomatid phosphofructokinases for the reverse reaction
Source: PubMed Central journal article supplement (PMC6340114; doi:10.1042/bcj20180635), 2019-01-18

## SUPPLEMENTARY FIGURE 1

- A) AMP activates TcPFK with respect to ADP titrations (F16BP 10mM). 0mM AMP (solid triangles ▲ with solid line), 0.5mM AMP (open triangles △ with dotted line)
- B) AMP activates TbPFK with respect to ADP titrations (F16BP 10mM). 0mM AMP (solid squares ■ with solid line), 0.5mM AMP (open squares □ with dotted line)
- C) AMP activates LmPFK with respect to ADP titrations (F16BP 20mM). 0mM AMP (solid circles ● with solid line), 0.5mM AMP (open circles ○ with dotted line)

(n= 2, error bars are standard deviations, results for each enzyme normalised to highest specific activity without AMP present).

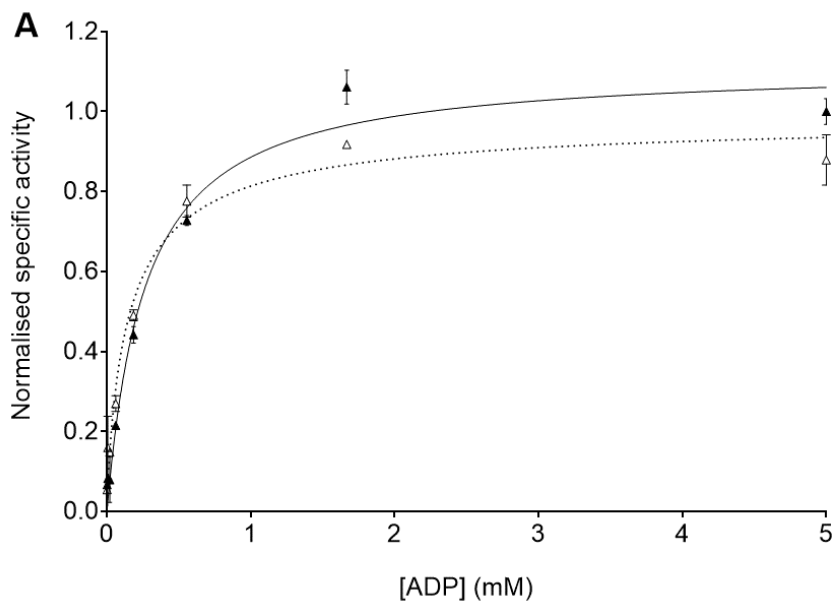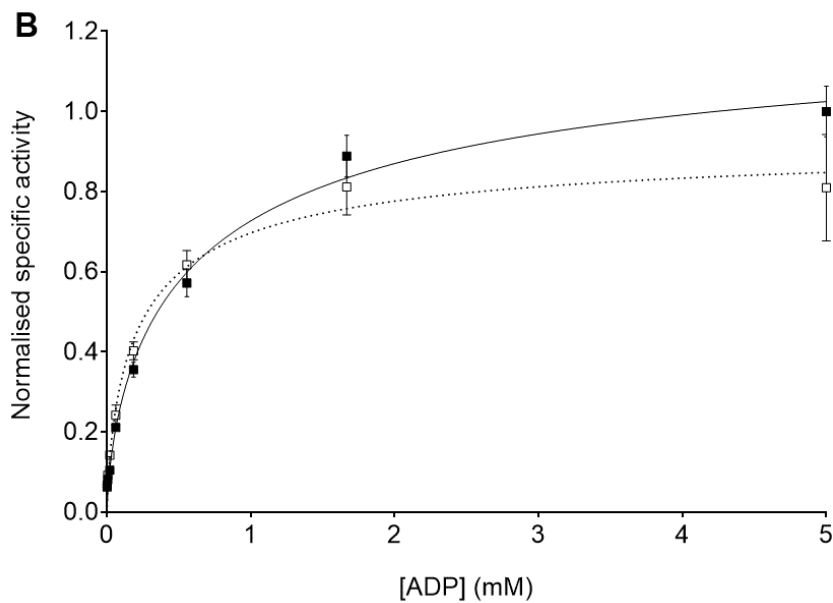

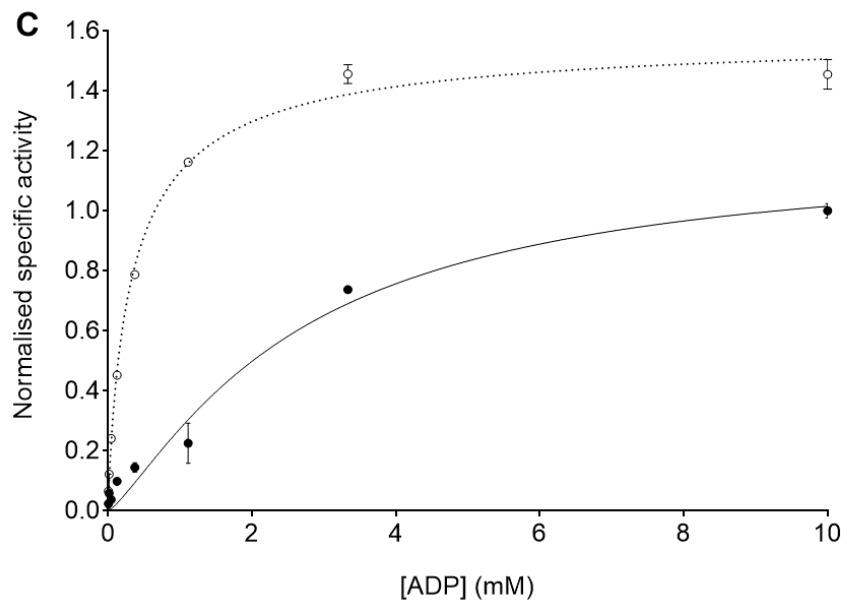

## SUPPLEMENTARY FIGURE 2

- A) AMP activates TcPFK with respect to F16BP titrations (ADP 5mM). 0mM AMP (solid triangles ▲ with solid line), 0.5mM AMP (open triangles △ with dotted line)
- B) AMP activates TbPFK with respect to F16BP titrations (ADP 5mM). 0mM AMP (solid squares ■ with solid line), 0.5mM AMP (open squares □ with dotted line)
- C) AMP activates LmPFK with respect to F16BP titrations (ADP 10mM). 0mM AMP (solid circles ● with solid line), 0.5mM AMP (open circles ○ with dotted line)

(n= 2, error bars are standard deviations, results for each enzyme normalised to highest specific activity without AMP present).

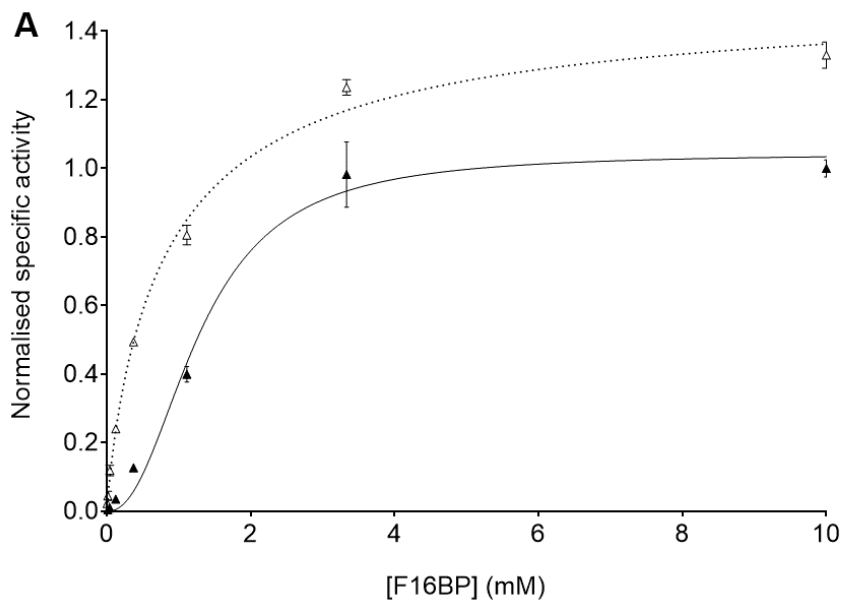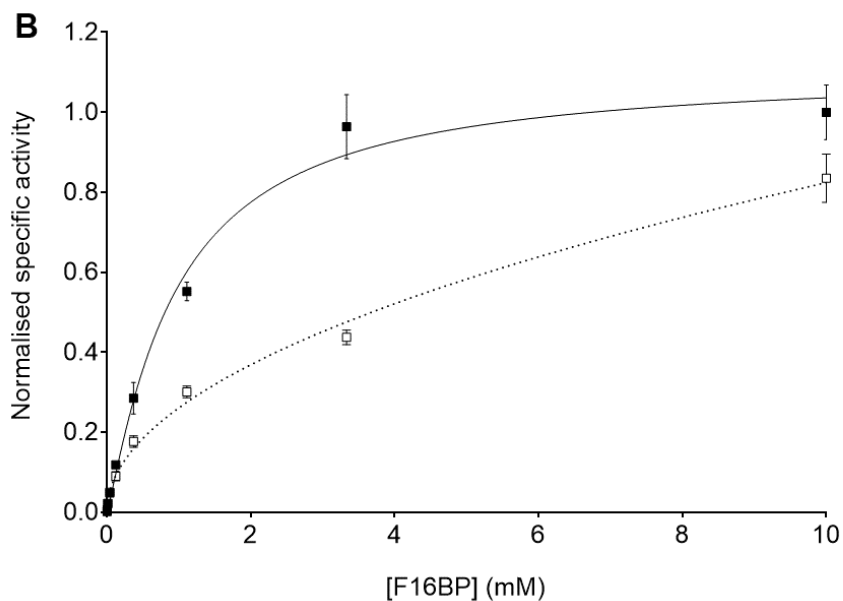

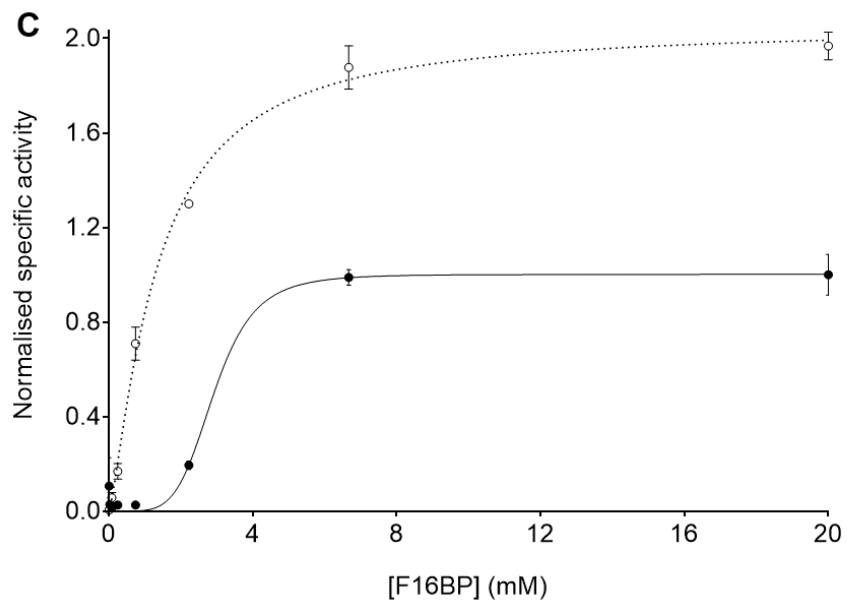

Supplement: BCJ-476-179-s1.pdf [file BCJ-476-179-s1.pdf]
